# Supplementary material
Source: publisher figshare collection journal article supplement (https://frontiersin.figshare.com/ndownloader/files/26140685)
Supplement: Supplementary file [file 26140685]

## Technical Supplement

### Definitions for Healthcare Spending

Healthcare spending included financial claims for all healthcare episodes and definitions for healthcare spending and type of service delivery as below:

*Total Cost* – total of reimbursed drug and medical costs

*Medical Cost* – total reimbursed medical costs (also known as medical benefit)

*Inpatient Cost* – total net reimbursed of inpatient services

*Outpatient Cost* – total net reimbursed for outpatient services

*Speciality Procedure and Diagnostics* – total reimbursed for speciality procedures

*Primary Care Services* – total reimbursed for primary care procedures

*Psychiatric Services* – total reimbursed for psychiatric service procedures

*Emergency Services* - total reimbursed for emergency services

*Drug cost* – total net reimbursed drug cost (also known as pharmacy benefit)

*Generic drug cost* – total net reimbursed drug cost for drugs categorized as generics

*Branded drug cost* – total net reimbursed drug cost for branded drugs

*Copay* – patient out of pocket drug cost

| Number of conditions | Number of patients with conditions | Average cost per patient | Number of CCAE patients with conditions | Average cost per CCAE patient | Number of Medicaid Patients with conditions | Average cost per Medicaid patient | Number of Medicare patients with conditions | Average cost per Medicare patient |
|----------------------|------------------------------------|--------------------------|-----------------------------------------|-------------------------------|---------------------------------------------|-----------------------------------|---------------------------------------------|-----------------------------------|
| 2                    | 23,551,408                         | \$ 4,385                 | 18,464,155                              | \$ 4,532                      | 2,231,793                                   | \$ 3,555                          | 2,855,461                                   | \$ 4,083                          |
| 3                    | 20,166,132                         | \$ 5,851                 | 14,520,758                              | \$ 6,099                      | 1,813,055                                   | \$ 4,935                          | 3,832,319                                   | \$ 5,343                          |
| 4                    | 16,392,071                         | \$ 7,735                 | 10,535,366                              | \$ 8,241                      | 1,511,182                                   | \$ 6,439                          | 4,345,523                                   | \$ 6,960                          |
| 5                    | 12,804,515                         | \$ 10,088                | 7,248,729                               | \$ 11,070                     | 1,245,461                                   | \$ 7,987                          | 4,310,326                                   | \$ 9,045                          |
| 6                    | 9,762,840                          | \$ 12,739                | 4,849,420                               | \$ 14,117                     | 1,031,158                                   | \$ 10,256                         | 3,882,263                                   | \$ 11,676                         |
| 7                    | 7,430,641                          | \$ 16,247                | 3,187,880                               | \$ 18,525                     | 853,450                                     | \$ 12,447                         | 3,389,311                                   | \$ 15,061                         |
| 8                    | 5,611,530                          | \$ 19,856                | 2,059,279                               | \$ 23,305                     | 695,610                                     | \$ 14,674                         | 2,856,641                                   | \$ 18,632                         |
| 9                    | 4,290,681                          | \$ 24,181                | 1,353,481                               | \$ 29,509                     | 555,028                                     | \$ 16,920                         | 2,382,172                                   | \$ 22,846                         |
| 10                   | 3,194,766                          | \$ 28,646                | 840,456                                 | \$ 36,379                     | 451,129                                     | \$ 19,772                         | 1,903,182                                   | \$ 27,335                         |
| 11                   | 2,448,914                          | \$ 33,874                | 555,969                                 | \$ 44,098                     | 360,018                                     | \$ 22,540                         | 1,532,927                                   | \$ 32,827                         |

**Table 1. Comparison of health spending between insurance type, by number of conditions** The data are scaled to the total US Adult 2015 population

|    | Condition 1                  | Condition 2        | Patient Count (%) |
|----|------------------------------|--------------------|-------------------|
| 1  | HIGH_CHOLESTEROL             | HYPERTENSION       | 281,901 (30.77 %) |
| 2  | DIABETES                     | HYPERTENSION       | 151,195 (16.23 %) |
| 3  | HYPERTENSION                 | OSTEOARTHRITIS     | 103,129 (11.07 %) |
| 4  | HIGH_CHOLESTEROL             | OTHER_ENDOCRINE    | 101,947 (10.94 %) |
| 5  | EYE_PROBLEM                  | HIGH_CHOLESTEROL   | 96,062 (10.31 %)  |
| 6  | HYPERTENSION                 | OTH_NEURO_DIS      | 95,260 (10.23%)   |
| 7  | HYPERTENSION                 | PUD_EXCLUDE_BLEED  | 93,537 (10.04 %)  |
| 8  | ANXIETY                      | DEPRESSION         | 89,326 (9.59 %)   |
| 9  | HIGH_CHOLESTEROL             | WEIGHT_LOSS        | 87,657 (9.41 %)   |
| 10 | ALLERGY                      | HYPERTENSION       | 87,293 (9.37 %)   |
| 11 | DEPRESSION                   | HYPERTENSION       | 84,388 (9.06 %)   |
| 12 | ALLERGY                      | HIGH_CHOLESTEROL   | 79,210 (8.50 %)   |
| 13 | HYPERTENSION                 | OBESITY            | 79,018 (8.48 %)   |
| 14 | CAD                          | HYPERTENSION       | 78,890 (8.47 %)   |
| 15 | CARDIAC_ARRH                 | HYPERTENSION       | 74,290 (7.97 %)   |
| 16 | DEPRESSION                   | HIGH_CHOLESTEROL   | 68,671 (7.37 %)   |
| 17 | ANXIETY                      | HIGH_CHOLESTEROL   | 61,369 (6.59 %)   |
| 18 | CARDIOMYOPATHY_HEART_DISEASE | HYPERTENSION       | 61,880 (6.46 %)   |
| 19 | CARDIOMYOPATHY_HEART_DISEASE | HIGH_CHOLESTEROL   | 51,295 (5.50 %)   |
| 20 | DIABETES                     | OTHER_ENDOCRINE    | 49,758 (5.344 %)  |
| 21 | DIABETES                     | OTH_NEURO_DIS      | 49,455 (5.31 %)   |
| 22 | HYPERTENSION                 | RENAL_FAILURE      | 44,353 (4.76 %)   |
| 23 | EYE_PROBLEM                  | OTHER_ENDOCRINE    | 41,685 (4.477 %)  |
| 24 | HYPERTENSION                 | MALIGNANT_NEOPLASM | 41,754 (4.48 %)   |

|    |         |             |                 |
|----|---------|-------------|-----------------|
| 25 | ALLERGY | EYE_PROBLEM | 40,771 (4.37 %) |
|----|---------|-------------|-----------------|

**Table 2. Top 25 Cluster Pairs of Conditions according to Prevalence**

|    | Condition 1      | Condition 2                  | Patient Count (%) |
|----|------------------|------------------------------|-------------------|
| 1  | HYPERTENSION     | HIGH_CHOLESTEROL             | 281,901 (30.28 %) |
| 2  | DIABETES         | HYPERTENSION                 | 151,195 (16.24 %) |
| 3  | DIABETES         | HIGH_CHOLESTEROL             | 133,956 (14.39 %) |
| 4  | OSTEOARTHRITIS   | HYPERTENSION                 | 103,129 (11.08 %) |
| 5  | DEPRESSION       | ANXIETY                      | 89,326 (9.59 %)   |
| 6  | HYPERTENSION     | CAD                          | 78,890 (8.47 %)   |
| 7  | HIGH_CHOLESTEROL | CAD                          | 70,624 (7.59 %)   |
| 8  | HIGH_CHOLESTEROL | ANXIETY                      | 61,369 (6.59 %)   |
| 9  | OTH_NEURO_DIS    | CHRONIC_PAIN                 | 59,003 (6.34 %)   |
| 10 | COPD             | ALLERGY                      | 44,486 (4.78 %)   |
| 11 | HYPERTENSION     | RENAL_FAILURE                | 44,353 (4.76 %)   |
| 12 | DIABETES         | CAD                          | 37,264 (4.00 %)   |
| 13 | COAGULOPATHY     | BLOOD_LOSS_ANEMIA            | 37,943 (4.08 %)   |
| 14 | CARDIAC_ARRH     | CARDIOMYOPATHY_HEART_DISEASE | 31,279 (3.36 %)   |
| 15 | COPD             | CAD                          | 26,633 (2.86 %)   |
| 16 | CARDIAC_ARRH     | VALVULAR                     | 24,386 (2.62 %)   |
| 17 | DEPRESSION       | CHRONIC_PAIN                 | 23,897 (2.57 %)   |
| 18 | DIABETES         | RENAL_FAILURE                | 24,710 (2.65 %)   |
| 19 | ANXIETY          | CHRONIC_PAIN                 | 22,841 (2.45 %)   |
| 20 | OSTEOARTHRITIS   | CHRONIC_PAIN                 | 20,897 (2.24 %)   |
| 21 | COPD             | CHRONIC_PAIN                 | 18,225 (1.96 %)   |
| 22 | RENAL_FAILURE    | CAD                          | 15,656 (1.68 %)   |

|    |               |                   |                 |
|----|---------------|-------------------|-----------------|
| 23 | RENAL_FAILURE | BLOOD_LOSS_ANEMIA | 13,403 (1.44 %) |
| 24 | CHF           | RENAL_FAILURE     | 13,256 (1.42 %) |
| 25 | WEIGHT_LOSS   | CYSTIC_FIBROSIS   | 8,983 (0.96 %)  |

**Table 3. Top 25 Cluster Pairs of Conditions according to Strength of Association**

|    | Conditions with Strong Associations *(>95%)                                  | Conditions with Moderate Associations *(15-95%)                                                  | Patient Count (%) |
|----|------------------------------------------------------------------------------|--------------------------------------------------------------------------------------------------|-------------------|
| 1  | Hypertension<br>High Cholesterol                                             | Other Endocrine<br>Eye Problems                                                                  | 123,203 (13.23%)  |
| 2  | High Cholesterol                                                             | Other Endocrine<br>Weight Loss<br>Allergy                                                        | 106,549 (11.44%)  |
| 3  | Hypertension                                                                 | Diabetes<br>Allergy                                                                              | 96,023 (10.31%)   |
| 4  | Depression                                                                   | Anxiety<br>Alcohol Abuse                                                                         | 85,184 (9.15%)    |
| 5  | Diabetes<br>High Cholesterol<br>Hypertension                                 | Eye Problems<br>Other Endocrine<br>Obesity                                                       | 73,935 (7.94%)    |
| 6  | Other Endocrine                                                              | Hypertension<br>Weight Loss                                                                      | 62,950 (6.76%)    |
|    | Peptic Ulcer Disease Excluding Bleed                                         | Hypertension<br>Allergy                                                                          | 58,446 (6.23%)    |
| 8  | Hypertension<br>Coronary Artery Disease<br>Cardiomyopathy                    | Cardiac Arrhythmia<br>Diabetes<br>Eye Problems                                                   | 54,591 (5.86%)    |
| 9  | Other Neurological Disorder<br>Chronic Pain                                  | Back Pain<br>Alcohol Abuse                                                                       | 42,121 (4.52%)    |
| 10 | Hypertension<br>High Cholesterol<br>Other Neurological Disease<br>Depression | COPD<br>Peptic Ulcer Disease Excluding Bleed<br>Diabetes<br>Back Pain<br>Other Endocrine Disease | 40,266 (4.32%)    |



|  |                           |  |  |
|--|---------------------------|--|--|
|  | Osteoarthritis<br>Anxiety |  |  |
|--|---------------------------|--|--|

**Table 4. K-Means Clustering of 2 or more Conditions** \*The second column reports the main chronic conditions that were present in over 95% of patients falling within that cluster; column three reports conditions that were present in 20-95% of patients within that cluster
